# Supplementary material for: Fire-derived phosphorus fertilization of African tropical forests
Source: PubMed Central journal article supplement (PMC8390740; doi:10.1038/s41467-021-25428-3), 2021-08-26
Supplement: 41467_2021_25428_MOESM1_ESM.pdf [file 41467_2021_25428_MOESM1_ESM.pdf]

## Supplementary Information for

### Fire-derived phosphorus fertilization of African tropical forests

Marijn Bauters<sup>1,2,\*</sup>, Travis W. Drake<sup>3</sup>, Sasha Wagner<sup>4</sup>, Simon Baumgartner<sup>1,5</sup>, Isaac Makelele<sup>1,6</sup>, Samuel Bodé<sup>1</sup>, Kris Verheyen<sup>2</sup>, Hans Verbeeck<sup>2</sup>, Corneille Ewango<sup>7</sup>, Landry Cizungu<sup>8</sup>, Kristof Van Oost<sup>5</sup>, Pascal Boeckx<sup>1</sup>

<sup>1</sup> Department of Green Chemistry and Technology, Ghent University, Ghent, 9000, Belgium

<sup>2</sup> Department of Environment, Ghent University, Ghent, 9000, Belgium

<sup>3</sup> Department of Environmental Systems Science, Swiss Federal Institute of Technology, ETH Zurich, Zurich, 8092, Switzerland

<sup>4</sup> Department of Earth and Environmental Sciences, Rensselaer Polytechnic Institute, Troy, New York, USA

<sup>5</sup> Earth and Life Institute, UCLouvain, Louvain-la-Neuve, 1348, Belgium

<sup>6</sup> Department of Biology, Université Officielle de Bukavu, Bukavu, DR Congo

<sup>7</sup> Faculty of Renewable Natural Resources Management, University of Kisangani, B.P.O. 2012, Kisangani, DR Congo

<sup>8</sup> Soil science laboratory, Faculty of Agronomy, Université Catholique de Bukavu, Bukavu, DR Congo

\* Corresponding author: [Marijn.Bauters@UGent.be](mailto:Marijn.Bauters@UGent.be)

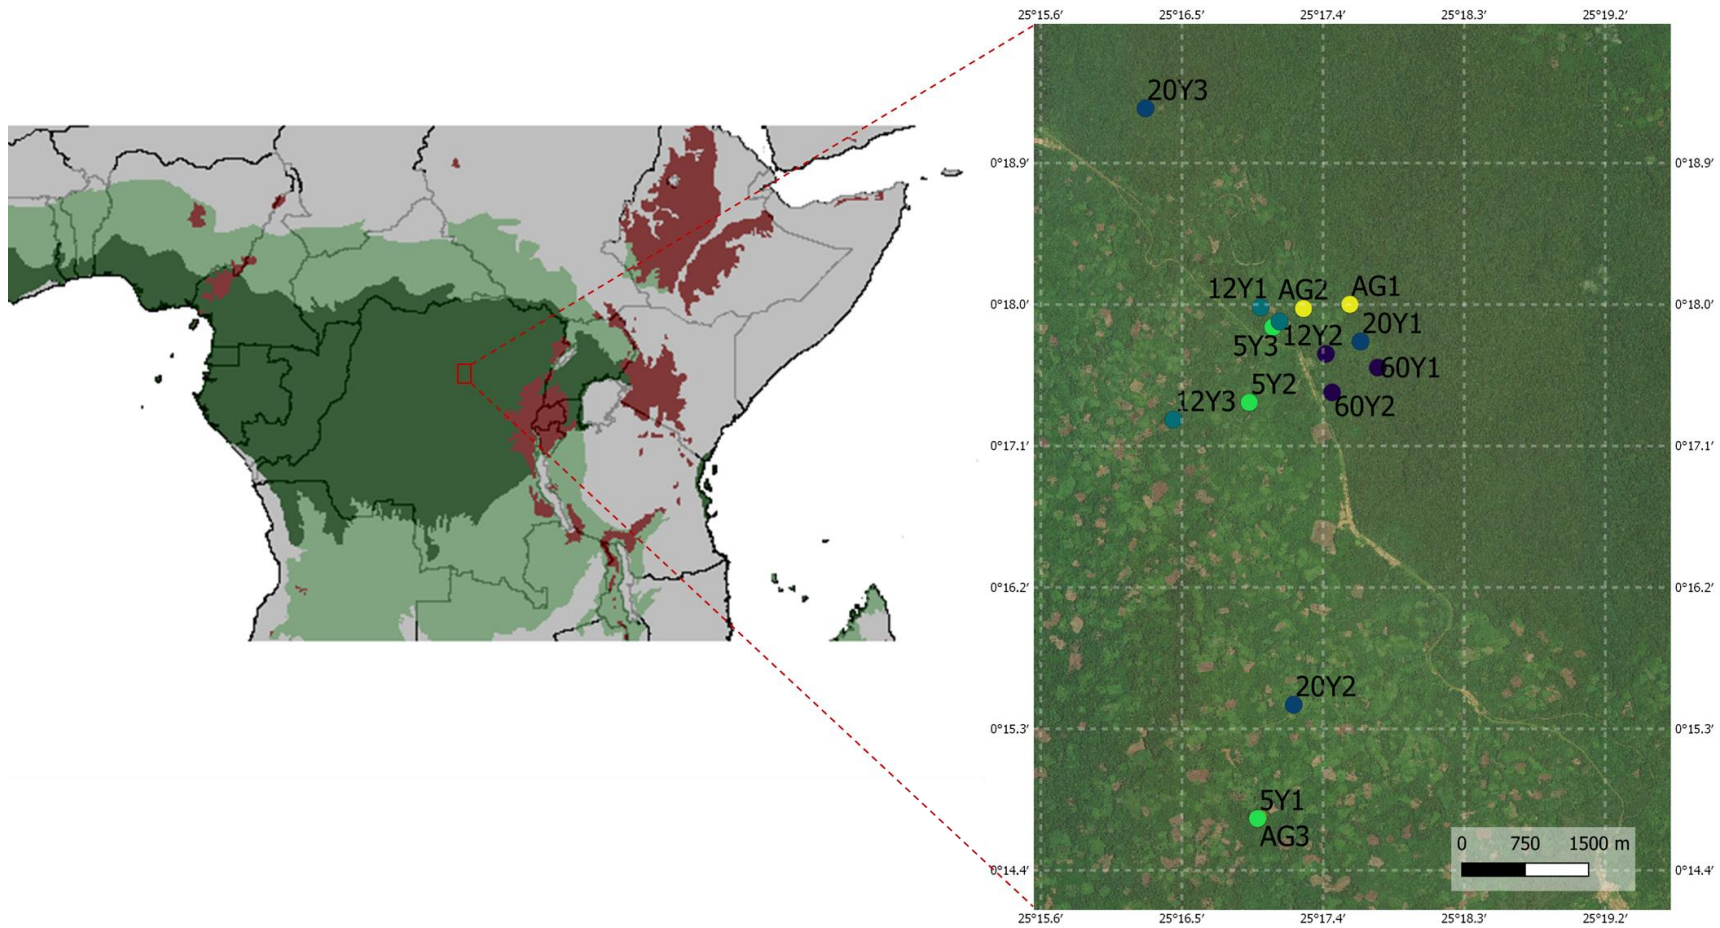

**Fig S1.** Overview of the study area with the triplicated experimental plots along successional stages of African forests: agricultural field (Ag), 5- (5yrs), 12- (12yrs), 20- (20yrs) and 60-year-old forest (60yrs). The coloration on the map (left) shows wet tropical forest (darkgreen), moist deciduous tropical forest (light green) and montane tropical forest (red).

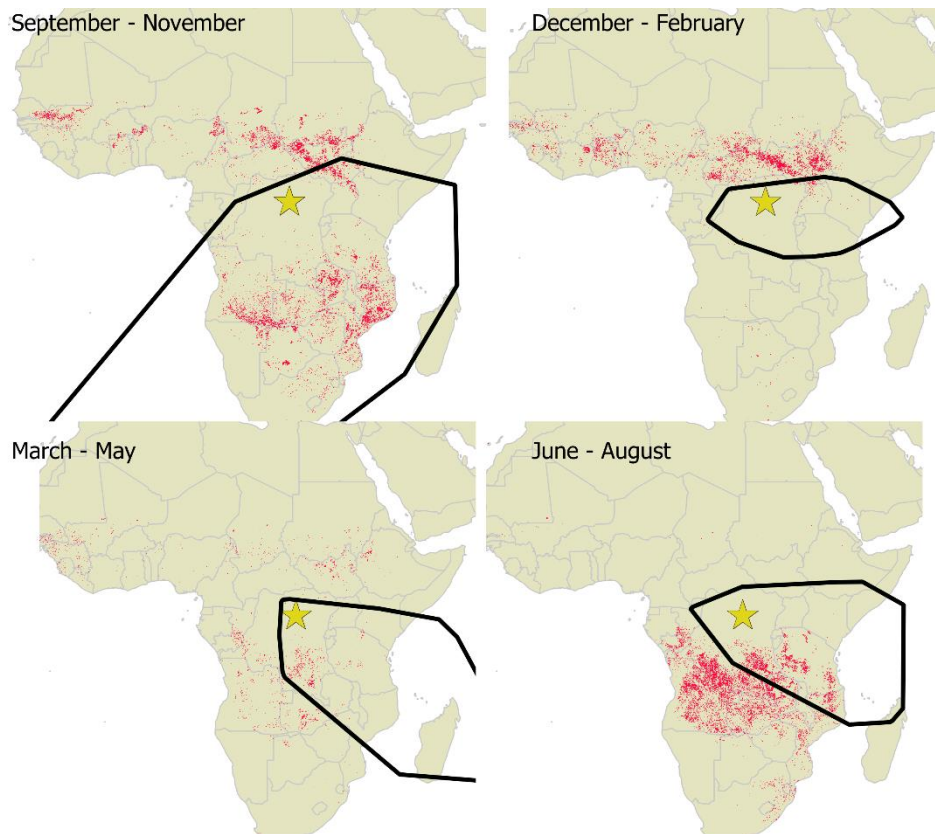

**Fig S2.** A visualization of the burnt area over the monitoring period (red) and a convex hull (in black) of daily wind back-trajectories (one week) arriving at the experimental site (star). This shows how winds originating from different parts of the African continent pass through burning zonings and potentially carry biomass burning-derived aerosols to the monitoring site.

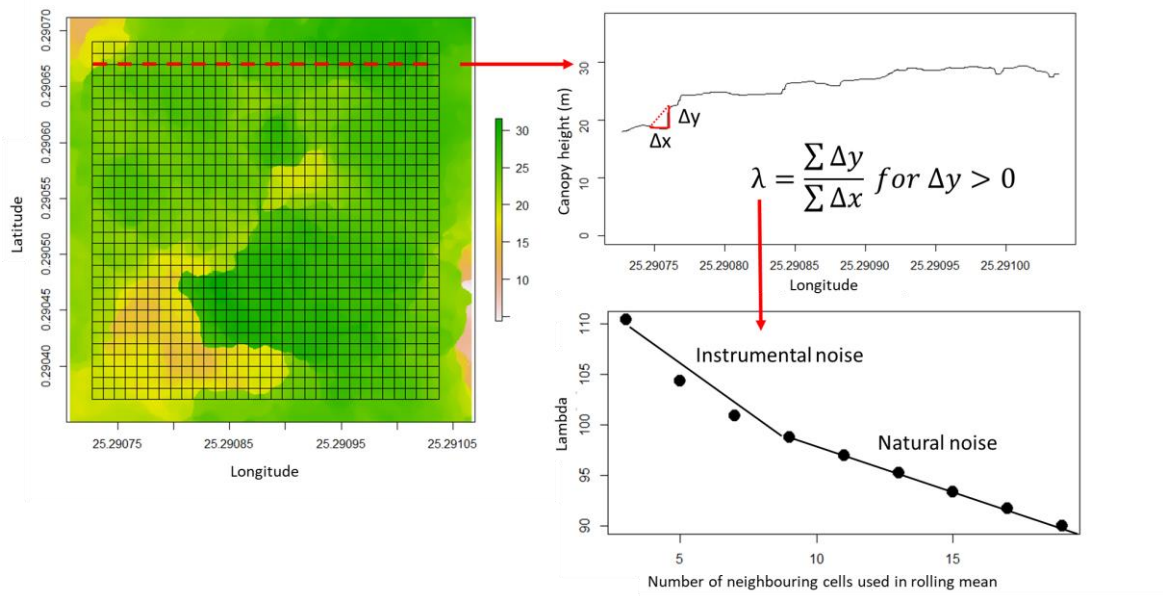

**Fig S3.** Overview of the lambda obstacle density parameter calculation for plot '60yr3' based on the canopy height models. Colors on the left indicate the canopy height.

**Table S1.** Canopy characteristics of the plots, along with canopy roughness length ( $Z_o$ ) and the total (TP) and dry DryP phosphorous deposition.

| <b>Plot</b> | <b>Forest type</b> | <b>Lambda</b> | <b>Max Tree height (m)</b> | <b><math>Z_o</math></b> | <b>TP (kg P ha<sup>-1</sup> yr<sup>-1</sup>)</b> | <b>DryP (kg P ha<sup>-1</sup> yr<sup>-1</sup>)</b> |
|-------------|--------------------|---------------|----------------------------|-------------------------|--------------------------------------------------|----------------------------------------------------|
| AG1         | Agriculture        | 0.83          | 0.50                       | 0.41                    | 1.02                                             | 0.17                                               |
| AG2         | Agriculture        | 0.61          | 0.50                       | 0.30                    | 1.55                                             | 0.38                                               |
| AG3         | Agriculture        | 0.50          | 0.50                       | 0.25                    | 1.36                                             | 0.37                                               |
| 5Y1         | 5yrs               | 0.53          | 12.33                      | 6.58                    | 7.14                                             | 5.77                                               |
| 5Y2         | 5yrs               | 0.75          | 12.40                      | 9.36                    | 3.46                                             | 1.98                                               |
| 5Y3         | 5yrs               | 0.61          | 12.40                      | 7.52                    | 3.74                                             | 2.48                                               |
| 12Y1        | 12yrs              | 0.41          | 15.13                      | 6.25                    | 4.94                                             | 3.62                                               |
| 12Y2        | 12yrs              | 0.33          | 18.47                      | 6.04                    | 3.45                                             | 2.41                                               |
| 12Y3        | 12yrs              | 0.47          | 21.40                      | 10.11                   | 4.96                                             | 3.49                                               |
| 20Y1        | 20yrs              | 0.50          | 25.47                      | 12.79                   | 2.70                                             | 1.48                                               |
| 20Y2        | 20yrs              | 0.72          | 21.60                      | 15.60                   | 3.14                                             | 1.97                                               |
| 20Y3        | 20yrs              | 0.92          | 19.60                      | 18.09                   | 4.02                                             | 2.77                                               |
| 60Y1        | 60yrs              | 0.88          | 27.80                      | 24.55                   | 6.36                                             | 5.09                                               |
| 60Y2        | 60yrs              | 0.88          | 31.67                      | 27.72                   | 7.57                                             | 6.32                                               |
| 60Y3        | 60yrs              | 0.90          | 28.20                      | 25.37                   | 14.43                                            | 12.97                                              |

**Table S2.** Concentrations of dissolved organic carbon (DOC), dissolved black carbon (DBC) and benzenhexacarboxylic acid (B6CA) and benzenepentacarboxylic acid (B5CA) products.

| Forest Type | Sampling Date | [B6CA] $\mu\text{M}$ | [B5CA] $\mu\text{M}$ | [DBC] $\mu\text{M-C}$ | [DBC] $\text{mg-C/L}$ | [DOC] $\mu\text{M-C}$ | [DOC] $\text{mg-C/L}$ |
|-------------|---------------|----------------------|----------------------|-----------------------|-----------------------|-----------------------|-----------------------|
| 12yrs       | 21/07/2018    | 0.07                 | 0.19                 | 14.48                 | 0.17                  | 482.67                | 5.79                  |
| 20yrs       | 21/07/2018    | 0.07                 | 0.19                 | 14.56                 | 0.17                  | 318.67                | 3.82                  |
| Ag          | 21/07/2018    | 0.03                 | 0.09                 | 7.21                  | 0.09                  | 213.58                | 2.56                  |
| 12yrs       | 28/07/2018    | 0.22                 | 0.55                 | 39.43                 | 0.47                  | 1570.83               | 18.85                 |
| 20yrs       | 28/07/2018    | 0.35                 | 0.80                 | 57.28                 | 0.69                  | 1257.50               | 15.09                 |
| 60yrs       | 28/07/2018    | 0.49                 | 1.12                 | 78.43                 | 0.94                  | 1952.50               | 23.43                 |
| 5yrs        | 28/07/2018    | 0.23                 | 0.55                 | 40.04                 | 0.48                  | 927.50                | 11.13                 |
| Ag          | 28/07/2018    | 0.13                 | 0.44                 | 30.12                 | 0.36                  | 481.75                | 5.78                  |
| 20yrs       | 4/08/2018     | 0.16                 | 0.40                 | 29.92                 | 0.36                  | 583.83                | 7.01                  |
| 60yrs       | 4/08/2018     | 0.33                 | 0.71                 | 51.93                 | 0.62                  | 980.00                | 11.76                 |
| 5yrs        | 4/08/2018     | 0.13                 | 0.31                 | 23.53                 | 0.28                  | 497.92                | 5.98                  |
| Ag          | 4/08/2018     | 0.03                 | 0.07                 | 5.92                  | 0.07                  | 121.58                | 1.46                  |
| 12yrs       | 11/08/2018    | 0.06                 | 0.19                 | 14.13                 | 0.17                  | 503.50                | 6.04                  |
| 20yrs       | 11/08/2018    | 0.14                 | 0.35                 | 26.12                 | 0.31                  | 528.17                | 6.34                  |
| 60yrs       | 11/08/2018    | 0.26                 | 0.56                 | 41.76                 | 0.50                  | 971.67                | 11.66                 |
| 5yrs        | 11/08/2018    | 0.06                 | 0.14                 | 11.55                 | 0.14                  | 360.08                | 4.32                  |
| 12yrs       | 18/08/2018    | 0.14                 | 0.34                 | 25.85                 | 0.31                  | 639.58                | 7.68                  |
| 20yrs       | 18/08/2018    | 0.21                 | 0.48                 | 35.86                 | 0.43                  | 744.92                | 8.94                  |
| 60yrs       | 18/08/2018    | 0.34                 | 0.76                 | 55.07                 | 0.66                  | 1320.83               | 15.85                 |
| 5yrs        | 18/08/2018    | 0.27                 | 0.54                 | 41.44                 | 0.50                  | 841.67                | 10.10                 |
| Ag          | 18/08/2018    | 0.14                 | 0.32                 | 24.57                 | 0.29                  | 342.58                | 4.11                  |
| 12yrs       | 25/08/2018    | 0.19                 | 0.49                 | 35.39                 | 0.42                  | 1015.83               | 12.19                 |
| 20yrs       | 25/08/2018    | 0.19                 | 0.47                 | 34.68                 | 0.42                  | 934.17                | 11.21                 |
| 5yrs        | 25/08/2018    | 0.34                 | 0.70                 | 51.98                 | 0.62                  | 987.50                | 11.85                 |
| Ag          | 25/08/2018    | 0.04                 | 0.11                 | 9.09                  | 0.11                  | 222.17                | 2.67                  |
| 12yrs       | 1/09/2018     | 0.07                 | 0.17                 | 13.37                 | 0.16                  | 285.25                | 3.42                  |
| 60yrs       | 1/09/2018     | 0.58                 | 0.96                 | 74.97                 | 0.90                  | 1592.50               | 19.11                 |
| 5yrs        | 1/09/2018     | 0.24                 | 0.48                 | 37.52                 | 0.45                  | 779.08                | 9.35                  |
| Ag          | 1/09/2018     | 0.06                 | 0.18                 | 13.68                 | 0.16                  | 317.25                | 3.81                  |
| 12yrs       | 3/11/2018     | 0.04                 | 0.09                 | 7.61                  | 0.09                  | 199.92                | 2.40                  |
| 20yrs       | 3/11/2018     | 0.08                 | 0.19                 | 15.29                 | 0.18                  | 281.92                | 3.38                  |
| 60yrs       | 3/11/2018     | 0.09                 | 0.21                 | 16.54                 | 0.20                  | 356.83                | 4.28                  |
| 5yrs        | 3/11/2018     | 0.04                 | 0.10                 | 7.89                  | 0.09                  | 179.50                | 2.15                  |
| 12yrs       | 10/11/2018    | 0.02                 | 0.06                 | 5.08                  | 0.06                  | 106.58                | 1.28                  |
| 20yrs       | 10/11/2018    | 0.10                 | 0.21                 | 17.08                 | 0.20                  | 497.33                | 5.97                  |
| 60yrs       | 10/11/2018    | 0.07                 | 0.20                 | 15.44                 | 0.19                  | 932.50                | 11.19                 |
| 5yrs        | 10/11/2018    | 0.03                 | 0.09                 | 7.40                  | 0.09                  | 264.08                | 3.17                  |
| Ag          | 10/11/2018    | 0.02                 | 0.06                 | 4.88                  | 0.06                  | 181.33                | 2.18                  |
| 20yrs       | 17/11/2018    | 0.07                 | 0.16                 | 13.29                 | 0.16                  | 327.67                | 3.93                  |
| 60yrs       | 17/11/2018    | 0.09                 | 0.19                 | 15.59                 | 0.19                  | 431.92                | 5.18                  |
| 5yrs        | 17/11/2018    | 0.04                 | 0.13                 | 9.97                  | 0.12                  | 358.92                | 4.31                  |
| Ag          | 17/11/2018    | 0.07                 | 0.19                 | 14.54                 | 0.17                  | 138.17                | 1.66                  |
| 12yrs       | 24/11/2018    | 0.06                 | 0.15                 | 12.38                 | 0.15                  | 231.00                | 2.77                  |
| 20yrs       | 24/11/2018    | 0.08                 | 0.19                 | 15.16                 | 0.18                  | 294.08                | 3.53                  |
| 60yrs       | 24/11/2018    | 0.08                 | 0.17                 | 14.61                 | 0.18                  | 251.08                | 3.01                  |
| 5yrs        | 24/11/2018    | 0.05                 | 0.11                 | 9.21                  | 0.11                  | 163.67                | 1.96                  |
| Ag          | 24/11/2018    | 0.01                 | 0.03                 | 2.52                  | 0.03                  | 60.10                 | 0.72                  |
| 12yrs       | 1/12/2018     | 0.07                 | 0.18                 | 14.10                 | 0.17                  | 193.83                | 2.33                  |
| 20yrs       | 1/12/2018     | 0.22                 | 0.48                 | 36.54                 | 0.44                  | 732.58                | 8.79                  |
| 60yrs       | 1/12/2018     | 0.23                 | 0.53                 | 38.90                 | 0.47                  | 895.83                | 10.75                 |
| 5yrs        | 1/12/2018     | 0.13                 | 0.29                 | 22.73                 | 0.27                  | 514.00                | 6.17                  |
| Ag          | 1/12/2018     | 0.09                 | 0.15                 | 13.77                 | 0.17                  | 379.58                | 4.56                  |
| 12yrs       | 8/12/2018     | 0.02                 | 0.05                 | 4.78                  | 0.06                  | 106.00                | 1.27                  |
| 60yrs       | 8/12/2018     | 0.04                 | 0.07                 | 6.75                  | 0.08                  | 144.25                | 1.73                  |
| 5yrs        | 8/12/2018     | 0.02                 | 0.04                 | 3.93                  | 0.05                  | 76.15                 | 0.91                  |
| Ag          | 8/12/2018     | 0.00                 | 0.01                 | 1.26                  | 0.02                  | 41.30                 | 0.50                  |
| 5yrs        | 22/12/2018    | 0.11                 | 0.25                 | 19.82                 | 0.24                  | 563.25                | 6.76                  |
| Ag          | 22/12/2018    | 0.02                 | 0.04                 | 3.42                  | 0.04                  | 131.33                | 1.58                  |
| 12yrs       | 29/12/2018    | 0.17                 | 0.38                 | 29.40                 | 0.35                  | 618.08                | 7.42                  |
| 60yrs       | 29/12/2018    | 0.18                 | 0.41                 | 31.48                 | 0.38                  | 608.08                | 7.30                  |
| 12yrs       | 5/01/2019     | 0.07                 | 0.15                 | 12.60                 | 0.15                  | 340.75                | 4.09                  |
| 20yrs       | 5/01/2019     | 0.15                 | 0.35                 | 26.26                 | 0.32                  | 410.08                | 4.92                  |
| 60yrs       | 5/01/2019     | 0.11                 | 0.23                 | 18.63                 | 0.22                  | 371.50                | 4.46                  |
| 5yrs        | 5/01/2019     | 0.04                 | 0.12                 | 9.33                  | 0.11                  | 187.92                | 2.26                  |

|       |            |      |      |       |      |         |       |
|-------|------------|------|------|-------|------|---------|-------|
| Ag    | 5/01/2019  | 0.01 | 0.03 | 2.91  | 0.03 | 51.39   | 0.62  |
| 60yrs | 19/01/2019 | 0.08 | 0.17 | 14.39 | 0.17 | 221.42  | 2.66  |
| 12yrs | 2/02/2019  | 0.07 | 0.19 | 14.92 | 0.18 | 293.75  | 3.53  |
| 20yrs | 2/02/2019  | 0.12 | 0.28 | 21.85 | 0.26 | 400.00  | 4.80  |
| 60yrs | 2/02/2019  | 0.14 | 0.28 | 22.58 | 0.27 | 417.17  | 5.01  |
| 5yrs  | 2/02/2019  | 0.12 | 0.27 | 21.38 | 0.26 | 403.67  | 4.84  |
| Ag    | 2/02/2019  | 0.06 | 0.16 | 12.81 | 0.15 | 266.08  | 3.19  |
| 12yrs | 9/02/2019  | 0.09 | 0.24 | 18.12 | 0.22 | 314.17  | 3.77  |
| 12yrs | 23/02/2019 | 0.12 | 0.28 | 21.96 | 0.26 | 478.00  | 5.74  |
| Ag    | 23/02/2019 | 0.01 | 0.04 | 3.25  | 0.04 | 80.89   | 0.97  |
| 12yrs | 2/03/2019  | 0.11 | 0.29 | 21.92 | 0.26 | 629.67  | 7.56  |
| 12yrs | 9/03/2019  | 0.14 | 0.28 | 22.80 | 0.27 | 419.17  | 5.03  |
| 12yrs | 23/03/2019 | 0.15 | 0.37 | 27.60 | 0.33 | 802.42  | 9.63  |
| 20yrs | 23/03/2019 | 0.17 | 0.44 | 31.60 | 0.38 | 763.58  | 9.16  |
| 60yrs | 23/03/2019 | 0.31 | 0.69 | 50.04 | 0.60 | 1609.17 | 19.31 |
| 5yrs  | 23/03/2019 | 0.12 | 0.27 | 21.42 | 0.26 | 464.50  | 5.57  |
| Ag    | 23/03/2019 | 0.04 | 0.12 | 9.38  | 0.11 | 289.75  | 3.48  |
| 12yrs | 30/03/2019 | 0.04 | 0.13 | 9.82  | 0.12 | 251.08  | 3.01  |
| 20yrs | 30/03/2019 | 0.07 | 0.18 | 14.11 | 0.17 | 275.42  | 3.31  |
| 60yrs | 30/03/2019 | 0.16 | 0.33 | 26.11 | 0.31 | 541.00  | 6.49  |
| 5yrs  | 30/03/2019 | 0.05 | 0.14 | 10.99 | 0.13 | 215.08  | 2.58  |
| Ag    | 30/03/2019 | 0.01 | 0.03 | 2.78  | 0.03 | 102.50  | 1.23  |
| 12yrs | 6/04/2019  | 0.01 | 0.03 | 2.82  | 0.03 | 264.08  | 3.17  |
| 20yrs | 6/04/2019  | 0.07 | 0.20 | 15.31 | 0.18 | 286.58  | 3.44  |
| 60yrs | 6/04/2019  | 0.18 | 0.37 | 29.53 | 0.35 | 606.17  | 7.27  |
| 5yrs  | 6/04/2019  | 0.05 | 0.14 | 11.07 | 0.13 | 250.75  | 3.01  |
| Ag    | 6/04/2019  | 0.01 | 0.04 | 3.15  | 0.04 | 115.75  | 1.39  |
| 12yrs | 13/04/2019 | 0.09 | 0.22 | 16.97 | 0.20 | 385.67  | 4.63  |
| 20yrs | 13/04/2019 | 0.07 | 0.22 | 16.30 | 0.20 | 5045.00 | 60.54 |
| 60yrs | 13/04/2019 | 0.27 | 0.56 | 42.23 | 0.51 | 950.83  | 11.41 |
| 5yrs  | 13/04/2019 | 0.08 | 0.21 | 16.01 | 0.19 | 350.83  | 4.21  |
| Ag    | 13/04/2019 | 0.02 | 0.04 | 3.91  | 0.05 | 113.67  | 1.36  |
| 12yrs | 20/04/2019 | 0.11 | 0.27 | 20.72 | 0.25 | 370.58  | 4.45  |
| 20yrs | 20/04/2019 | 0.05 | 0.13 | 10.38 | 0.12 | 188.00  | 2.26  |
| 60yrs | 20/04/2019 | 0.12 | 0.26 | 20.69 | 0.25 | 392.75  | 4.71  |
| 5yrs  | 20/04/2019 | 0.06 | 0.17 | 13.33 | 0.16 | 253.42  | 3.04  |
| Ag    | 20/04/2019 | 0.02 | 0.06 | 4.99  | 0.06 | 118.92  | 1.43  |
| 12yrs | 27/04/2019 | 0.05 | 0.14 | 10.99 | 0.13 | 222.17  | 2.67  |
| 20yrs | 27/04/2019 | 0.07 | 0.20 | 15.23 | 0.18 | 273.08  | 3.28  |
| 60yrs | 27/04/2019 | 0.07 | 0.16 | 13.02 | 0.16 | 267.58  | 3.21  |
| 5yrs  | 27/04/2019 | 0.07 | 0.17 | 13.56 | 0.16 | 233.50  | 2.80  |
| Ag    | 27/04/2019 | 0.03 | 0.07 | 5.63  | 0.07 | 143.25  | 1.72  |
| 12yrs | 4/05/2019  | 0.12 | 0.27 | 21.08 | 0.25 | 589.83  | 7.08  |
| 20yrs | 4/05/2019  | 0.17 | 0.53 | 36.21 | 0.43 | 699.25  | 8.39  |
| 60yrs | 4/05/2019  | 0.22 | 0.51 | 37.46 | 0.45 | 845.00  | 10.14 |
| 5yrs  | 4/05/2019  | 0.09 | 0.22 | 16.77 | 0.20 | 400.67  | 4.81  |
| Ag    | 4/05/2019  | 0.01 | 0.03 | 3.10  | 0.04 | 123.58  | 1.48  |
| 12yrs | 11/05/2019 | 0.04 | 0.09 | 7.40  | 0.09 | 188.08  | 2.26  |
| 20yrs | 11/05/2019 | 0.04 | 0.10 | 7.89  | 0.09 | 164.83  | 1.98  |
| 60yrs | 11/05/2019 | 0.13 | 0.25 | 20.73 | 0.25 | 411.75  | 4.94  |
| 5yrs  | 11/05/2019 | 0.04 | 0.11 | 9.11  | 0.11 | 161.58  | 1.94  |
| Ag    | 11/05/2019 | 0.01 | 0.02 | 2.02  | 0.02 | 87.08   | 1.05  |
| 12yrs | 18/05/2019 | 0.09 | 0.21 | 16.68 | 0.20 | 410.08  | 4.92  |
| 20yrs | 18/05/2019 | 0.08 | 0.19 | 14.79 | 0.18 | 281.08  | 3.37  |
| 60yrs | 18/05/2019 | 0.18 | 0.37 | 29.12 | 0.35 | 694.58  | 8.34  |
| 5yrs  | 18/05/2019 | 0.06 | 0.14 | 11.72 | 0.14 | 251.92  | 3.02  |
| Ag    | 18/05/2019 | 0.01 | 0.03 | 3.05  | 0.04 | 91.75   | 1.10  |
| 12yrs | 25/05/2019 | 0.08 | 0.20 | 15.71 | 0.19 | 373.50  | 4.48  |
| 20yrs | 25/05/2019 | 0.04 | 0.11 | 9.02  | 0.11 | 207.00  | 2.48  |
| 60yrs | 25/05/2019 | 0.38 | 1.23 | 77.88 | 0.93 | 1383.33 | 16.60 |
| 5yrs  | 25/05/2019 | 0.06 | 0.15 | 12.13 | 0.15 | 241.50  | 2.90  |
| Ag    | 25/05/2019 | 0.02 | 0.04 | 3.56  | 0.04 | 115.50  | 1.39  |
| 12yrs | 1/06/2019  | 0.05 | 0.14 | 10.79 | 0.13 | 292.92  | 3.52  |
| 20yrs | 1/06/2019  | 0.08 | 0.20 | 15.58 | 0.19 | 307.67  | 3.69  |
| 60yrs | 1/06/2019  | 0.16 | 0.28 | 24.20 | 0.29 | 560.58  | 6.73  |
| 5yrs  | 1/06/2019  | 0.05 | 0.13 | 10.24 | 0.12 | 228.08  | 2.74  |
| Ag    | 1/06/2019  | 0.01 | 0.04 | 3.65  | 0.04 | 122.33  | 1.47  |
| 12yrs | 8/06/2019  | 0.03 | 0.07 | 5.75  | 0.07 | 142.42  | 1.71  |
| 5yrs  | 8/06/2019  | 0.04 | 0.09 | 7.68  | 0.09 | 181.75  | 2.18  |
| Ag    | 8/06/2019  | 0.00 | 0.01 | 1.16  | 0.01 | 88.00   | 1.06  |
| 12yrs | 29/06/2019 | 0.12 | 0.30 | 23.00 | 0.28 | 422.50  | 5.07  |

|       |            |      |      |       |      |        |       |
|-------|------------|------|------|-------|------|--------|-------|
| 20yrs | 29/06/2019 | 0.14 | 0.34 | 26.02 | 0.31 | 450.33 | 5.40  |
| 60yrs | 29/06/2019 | 0.16 | 0.35 | 27.02 | 0.32 | 609.00 | 7.31  |
| 5yrs  | 29/06/2019 | 0.12 | 0.29 | 21.79 | 0.26 | 383.25 | 4.60  |
| Ag    | 29/06/2019 | 0.10 | 0.16 | 14.67 | 0.18 | 250.58 | 3.01  |
| 12yrs | 6/07/2019  | 0.09 | 0.22 | 16.94 | 0.20 | 309.67 | 3.72  |
| 20yrs | 6/07/2019  | 0.14 | 0.31 | 24.33 | 0.29 | 491.50 | 5.90  |
| 60yrs | 6/07/2019  | 0.20 | 0.46 | 34.33 | 0.41 | 772.50 | 9.27  |
| 5yrs  | 6/07/2019  | 0.13 | 0.31 | 23.42 | 0.28 | 414.75 | 4.98  |
| Ag    | 6/07/2019  | 0.05 | 0.13 | 10.79 | 0.13 | 220.50 | 2.65  |
| 12yrs | 13/07/2019 | 0.13 | 0.30 | 23.27 | 0.28 | 440.67 | 5.29  |
| 20yrs | 13/07/2019 | 0.09 | 0.23 | 18.17 | 0.22 | 317.08 | 3.81  |
| 60yrs | 13/07/2019 | 0.13 | 0.29 | 22.73 | 0.27 | 459.58 | 5.52  |
| 5yrs  | 13/07/2019 | 0.05 | 0.11 | 9.30  | 0.11 | 178.67 | 2.14  |
| Ag    | 13/07/2019 | 0.02 | 0.04 | 3.55  | 0.04 | 93.42  | 1.12  |
| 12yrs | 20/07/2019 | 0.13 | 0.34 | 25.61 | 0.31 | 532.33 | 6.39  |
| 20yrs | 20/07/2019 | 0.24 | 0.54 | 40.13 | 0.48 | 856.67 | 10.28 |
| 60yrs | 20/07/2019 | 0.25 | 0.53 | 39.83 | 0.48 | 861.67 | 10.34 |
| 5yrs  | 20/07/2019 | 0.13 | 0.27 | 21.79 | 0.26 | 539.50 | 6.47  |
| Ag    | 20/07/2019 | 0.06 | 0.13 | 10.51 | 0.13 | 336.25 | 4.04  |
| 12yrs | 27/07/2019 | 0.13 | 0.40 | 28.37 | 0.34 | 605.67 | 7.27  |
| 20yrs | 27/07/2019 | 0.13 | 0.30 | 23.27 | 0.28 | 567.00 | 6.80  |
| 60yrs | 27/07/2019 | 0.13 | 0.30 | 23.37 | 0.28 | 573.33 | 6.88  |
| 5yrs  | 27/07/2019 | 0.21 | 0.45 | 34.42 | 0.41 | 676.92 | 8.12  |
| Ag    | 27/07/2019 | 0.04 | 0.10 | 8.24  | 0.10 | 240.33 | 2.88  |



**Table S3.** Weekly rainfall amount, phosphorus concentrations and deposition in the monitoring plots.

| Date       | Plot | Type  | Volume<br>(mm week <sup>-1</sup> ) | Concentration<br>(mg P L <sup>-1</sup> ) | Deposition<br>(kg P week <sup>-1</sup> ) |
|------------|------|-------|------------------------------------|------------------------------------------|------------------------------------------|
| 25/08/2018 | AG1  | Ag    | 21.50                              | 0.24                                     | 0.02                                     |
| 25/08/2018 | AG3  | Ag    | 20.23                              | 0.94                                     | 0.06                                     |
| 25/08/2018 | AG2  | Ag    | 48.67                              | 0.20                                     | 0.03                                     |
| 25/08/2018 | 5Y1  | 5yrs  | 48.88                              | 0.84                                     | 0.13                                     |
| 25/08/2018 | 5Y2  | 5yrs  | 15.42                              | 0.61                                     | 0.03                                     |
| 25/08/2018 | 5Y3  | 5yrs  | 12.00                              | 0.52                                     | 0.02                                     |
| 25/08/2018 | 12Y1 | 12yrs | 14.92                              | 2.52                                     | 0.12                                     |
| 25/08/2018 | 12Y2 | 12yrs | 15.77                              | 0.27                                     | 0.01                                     |
| 25/08/2018 | 12Y3 | 12yrs | 13.79                              | 0.86                                     | 0.04                                     |
| 25/08/2018 | 60Y1 | 60yrs | 18.46                              | 1.80                                     | 0.11                                     |
| 25/08/2018 | 60Y2 | 60yrs | 22.64                              | 1.15                                     | 0.08                                     |
| 25/08/2018 | 60Y3 | 60yrs | 12.59                              | 2.17                                     | 0.09                                     |
| 25/08/2018 | 20Y1 | 20yrs | 46.16                              | 0.18                                     | 0.03                                     |
| 25/08/2018 | 20Y2 | 20yrs | 21.04                              | 0.44                                     | 0.03                                     |
| 25/08/2018 | 20Y3 | 20yrs | 11.71                              | 0.44                                     | 0.02                                     |
| 1/09/2018  | AG1  | Ag    | 4.48                               | 0.42                                     | 0.01                                     |
| 1/09/2018  | AG3  | Ag    | 4.95                               | 1.77                                     | 0.03                                     |
| 1/09/2018  | AG2  | Ag    | 3.75                               | 1.39                                     | 0.02                                     |
| 1/09/2018  | 5Y1  | 5yrs  | 3.71                               | 2.11                                     | 0.03                                     |
| 1/09/2018  | 5Y2  | 5yrs  | 3.27                               | 1.64                                     | 0.02                                     |
| 1/09/2018  | 5Y3  | 5yrs  | 4.25                               | 1.56                                     | 0.02                                     |
| 1/09/2018  | 12Y1 | 12yrs | 2.87                               | 1.90                                     | 0.02                                     |
| 1/09/2018  | 12Y2 | 12yrs | 4.24                               | 0.36                                     | 0.00                                     |
| 1/09/2018  | 12Y3 | 12yrs | 2.67                               | 1.08                                     | 0.01                                     |
| 1/09/2018  | 60Y1 | 60yrs | 4.54                               | 1.32                                     | 0.02                                     |
| 1/09/2018  | 60Y2 | 60yrs | 1.27                               | 2.86                                     | 0.01                                     |
| 1/09/2018  | 60Y3 | 60yrs | 2.99                               | 3.19                                     | 0.03                                     |
| 1/09/2018  | 20Y1 | 20yrs | 1.17                               | 2.10                                     | 0.01                                     |
| 1/09/2018  | 20Y2 | 20yrs | 4.39                               | 1.06                                     | 0.02                                     |
| 1/09/2018  | 20Y3 | 20yrs | 4.97                               | 0.46                                     | 0.01                                     |
| 8/09/2018  | AG1  | Ag    | 65.50                              | 0.08                                     | 0.02                                     |
| 8/09/2018  | AG3  | Ag    | 113.32                             | 0.22                                     | 0.08                                     |
| 8/09/2018  | AG2  | Ag    | 47.25                              | 0.12                                     | 0.02                                     |
| 8/09/2018  | 5Y1  | 5yrs  | 41.03                              | 0.53                                     | 0.07                                     |
| 8/09/2018  | 5Y2  | 5yrs  | 90.69                              | 0.36                                     | 0.11                                     |
| 8/09/2018  | 5Y3  | 5yrs  | 45.11                              | 0.37                                     | 0.05                                     |
| 8/09/2018  | 12Y1 | 12yrs | 35.76                              | 0.44                                     | 0.05                                     |
| 8/09/2018  | 12Y2 | 12yrs | 45.98                              | 0.54                                     | 0.08                                     |
| 8/09/2018  | 12Y3 | 12yrs | 89.70                              | 0.34                                     | 0.10                                     |
| 8/09/2018  | 60Y1 | 60yrs | 52.49                              | 0.35                                     | 0.06                                     |
| 8/09/2018  | 60Y2 | 60yrs | 53.48                              | 0.50                                     | 0.09                                     |
| 8/09/2018  | 60Y3 | 60yrs | 88.70                              | 0.53                                     | 0.15                                     |
| 8/09/2018  | 20Y1 | 20yrs | 51.21                              | 0.25                                     | 0.04                                     |
| 8/09/2018  | 20Y2 | 20yrs | 42.58                              | 0.59                                     | 0.08                                     |
| 8/09/2018  | 20Y3 | 20yrs | 47.82                              | 0.23                                     | 0.04                                     |
| 15/09/2018 | AG1  | Ag    | 83.22                              | 0.00                                     | 0.00                                     |
| 15/09/2018 | AG1  | Ag    | 83.22                              | 0.01                                     | 0.00                                     |
| 15/09/2018 | AG2  | Ag    | 104.41                             | 0.00                                     | 0.00                                     |
| 15/09/2018 | 5Y1  | 5yrs  | 100.87                             | 0.26                                     | 0.09                                     |
| 15/09/2018 | 5Y2  | 5yrs  | 39.75                              | 0.05                                     | 0.01                                     |
| 15/09/2018 | 5Y3  | 5yrs  | 66.49                              | 0.35                                     | 0.08                                     |
| 15/09/2018 | 12Y1 | 12yrs | 60.21                              | 0.10                                     | 0.02                                     |
| 15/09/2018 | 12Y2 | 12yrs | 142.18                             | 0.08                                     | 0.04                                     |
| 15/09/2018 | 60Y1 | 60yrs | 68.47                              | 0.05                                     | 0.01                                     |
| 15/09/2018 | 60Y2 | 60yrs | 75.72                              | 0.13                                     | 0.03                                     |
| 15/09/2018 | 60Y3 | 60yrs | 54.75                              | 0.34                                     | 0.06                                     |
| 15/09/2018 | 20Y1 | 20yrs | 91.11                              | 0.05                                     | 0.01                                     |
| 15/09/2018 | 20Y2 | 20yrs | 59.70                              | 0.04                                     | 0.01                                     |
| 15/09/2018 | 20Y3 | 20yrs | 33.11                              | 0.08                                     | 0.01                                     |
| 30/09/2018 | AG1  | Ag    | 60.02                              | 0.01                                     | 0.00                                     |
| 30/09/2018 | AG3  | Ag    | 57.16                              | 0.02                                     | 0.00                                     |
| 30/09/2018 | AG2  | Ag    | 32.47                              | 0.04                                     | 0.00                                     |
| 30/09/2018 | 5Y1  | 5yrs  | 33.32                              | 0.29                                     | 0.03                                     |
| 30/09/2018 | 5Y3  | 5yrs  | 47.18                              | 0.09                                     | 0.01                                     |
| 30/09/2018 | 12Y1 | 12yrs | 45.05                              | 0.09                                     | 0.01                                     |
| 30/09/2018 | 12Y2 | 12yrs | 53.69                              | 0.04                                     | 0.01                                     |

|            |      |       |        |      |      |
|------------|------|-------|--------|------|------|
| 30/09/2018 | 60Y1 | 60yrs | 50.22  | 0.01 | 0.00 |
| 30/09/2018 | 60Y2 | 60yrs | 50.29  | 0.05 | 0.01 |
| 30/09/2018 | 60Y3 | 60yrs | 19.28  | 0.80 | 0.05 |
| 30/09/2018 | 20Y2 | 20yrs | 43.50  | 0.05 | 0.01 |
| 30/09/2018 | 20Y3 | 20yrs | 31.05  | 0.08 | 0.01 |
| 20/10/2018 | AG1  | Ag    | 7.07   | 0.05 | 0.00 |
| 20/10/2018 | AG2  | Ag    | 10.72  | 0.15 | 0.01 |
| 20/10/2018 | 5Y3  | 5yrs  | 7.46   | 0.45 | 0.01 |
| 20/10/2018 | 12Y1 | 12yrs | 4.21   | 0.08 | 0.00 |
| 20/10/2018 | 12Y2 | 12yrs | 7.60   | 0.17 | 0.00 |
| 20/10/2018 | 60Y1 | 60yrs | 2.97   | 0.96 | 0.01 |
| 20/10/2018 | 60Y2 | 60yrs | 4.88   | 1.22 | 0.02 |
| 20/10/2018 | 20Y1 | 20yrs | 9.39   | 0.00 | 0.00 |
| 20/10/2018 | 20Y2 | 20yrs | 3.61   | 0.42 | 0.00 |
| 27/10/2018 | AG1  | Ag    | 80.64  | 0.00 | 0.00 |
| 27/10/2018 | AG3  | Ag    | 71.30  | 0.00 | 0.00 |
| 27/10/2018 | 12Y2 | 12yrs | 50.79  | 0.07 | 0.01 |
| 27/10/2018 | 60Y1 | 60yrs | 59.84  | 0.27 | 0.05 |
| 27/10/2018 | 60Y2 | 60yrs | 55.88  | 0.16 | 0.03 |
| 27/10/2018 | 20Y1 | 20yrs | 21.15  | 0.05 | 0.00 |
| 27/10/2018 | 20Y2 | 20yrs | 69.75  | 0.07 | 0.01 |
| 3/11/2018  | AG2  | Ag    | 113.32 | 0.05 | 0.02 |
| 3/11/2018  | 5Y1  | 5yrs  | 98.27  | 0.46 | 0.15 |
| 3/11/2018  | 5Y2  | 5yrs  | 118.98 | 0.29 | 0.11 |
| 3/11/2018  | 60Y1 | 60yrs | 80.36  | 0.18 | 0.05 |
| 3/11/2018  | 60Y2 | 60yrs | 78.94  | 0.21 | 0.05 |
| 3/11/2018  | 20Y1 | 20yrs | 94.36  | 0.12 | 0.04 |
| 3/11/2018  | 20Y2 | 20yrs | 74.42  | 0.07 | 0.02 |
| 3/11/2018  | 20Y3 | 20yrs | 133.84 | 0.15 | 0.07 |
| 10/11/2018 | AG2  | Ag    | 2.83   | 0.60 | 0.01 |
| 10/11/2018 | 5Y1  | 5yrs  | 3.25   | 6.27 | 0.07 |
| 10/11/2018 | 12Y3 | 12yrs | 98.33  | 0.11 | 0.03 |
| 10/11/2018 | 20Y1 | 20yrs | 1.63   | 2.50 | 0.01 |
| 17/11/2018 | AG2  | Ag    | 27.30  | 0.04 | 0.00 |
| 17/11/2018 | 5Y1  | 5yrs  | 24.19  | 0.59 | 0.05 |
| 17/11/2018 | 5Y2  | 5yrs  | 48.46  | 0.14 | 0.02 |
| 17/11/2018 | 5Y3  | 5yrs  | 39.33  | 0.11 | 0.01 |
| 17/11/2018 | 12Y1 | 12yrs | 37.80  | 0.03 | 0.00 |
| 17/11/2018 | 12Y2 | 12yrs | 44.28  | 0.05 | 0.01 |
| 17/11/2018 | 12Y3 | 12yrs | 50.15  | 0.06 | 0.01 |
| 17/11/2018 | 60Y1 | 60yrs | 43.93  | 0.11 | 0.02 |
| 17/11/2018 | 60Y2 | 60yrs | 51.03  | 0.13 | 0.02 |
| 17/11/2018 | 60Y3 | 60yrs | 62.98  | 0.67 | 0.14 |
| 17/11/2018 | 20Y1 | 20yrs | 17.81  | 0.07 | 0.00 |
| 17/11/2018 | 20Y2 | 20yrs | 40.32  | 0.09 | 0.01 |
| 24/11/2018 | AG1  | Ag    | 29.85  | 0.04 | 0.00 |
| 24/11/2018 | AG3  | Ag    | 28.86  | 0.01 | 0.00 |
| 24/11/2018 | AG2  | Ag    | 26.67  | 0.19 | 0.02 |
| 24/11/2018 | 5Y1  | 5yrs  | 25.47  | 0.56 | 0.05 |
| 24/11/2018 | 5Y2  | 5yrs  | 21.36  | 0.15 | 0.01 |
| 24/11/2018 | 5Y3  | 5yrs  | 20.80  | 0.31 | 0.02 |
| 24/11/2018 | 12Y1 | 12yrs | 21.96  | 0.31 | 0.02 |
| 24/11/2018 | 12Y2 | 12yrs | 25.54  | 0.26 | 0.02 |
| 24/11/2018 | 60Y1 | 60yrs | 18.46  | 0.25 | 0.01 |
| 24/11/2018 | 60Y2 | 60yrs | 20.58  | 0.07 | 0.00 |
| 24/11/2018 | 60Y3 | 60yrs | 17.25  | 1.30 | 0.07 |
| 24/11/2018 | 20Y1 | 20yrs | 31.76  | 0.23 | 0.02 |
| 24/11/2018 | 20Y2 | 20yrs | 18.96  | 0.36 | 0.02 |
| 1/12/2018  | AG3  | Ag    | 1.49   | 1.20 | 0.01 |
| 1/12/2018  | AG3  | Ag    | 1.49   | 1.22 | 0.01 |
| 1/12/2018  | AG2  | Ag    | 2.55   | 1.55 | 0.01 |
| 1/12/2018  | 5Y1  | 5yrs  | 1.63   | 2.50 | 0.01 |
| 1/12/2018  | 5Y1  | 5yrs  | 1.63   | 3.26 | 0.02 |
| 1/12/2018  | 12Y2 | 12yrs | 0.74   | 3.89 | 0.01 |
| 1/12/2018  | 60Y1 | 60yrs | 2.33   | 0.99 | 0.01 |
| 1/12/2018  | 60Y3 | 60yrs | 0.74   | 3.93 | 0.01 |
| 1/12/2018  | 20Y1 | 20yrs | 2.18   | 1.27 | 0.01 |
| 1/12/2018  | 20Y2 | 20yrs | 0.78   | 2.67 | 0.01 |
| 1/12/2018  | 20Y3 | 20yrs | 50.57  | 0.34 | 0.06 |
| 8/12/2018  | AG3  | Ag    | 77.46  | 0.00 | 0.00 |
| 8/12/2018  | AG3  | Ag    | 77.46  | 0.01 | 0.00 |

|            |      |       |        |      |      |
|------------|------|-------|--------|------|------|
| 8/12/2018  | AG2  | Ag    | 134.74 | 0.00 | 0.00 |
| 8/12/2018  | 5Y1  | 5yrs  | 146.57 | 0.15 | 0.07 |
| 8/12/2018  | 5Y2  | 5yrs  | 62.82  | 0.05 | 0.01 |
| 8/12/2018  | 5Y3  | 5yrs  | 55.60  | 0.00 | 0.00 |
| 8/12/2018  | 12Y1 | 12yrs | 58.41  | 0.04 | 0.01 |
| 8/12/2018  | 12Y2 | 12yrs | 77.39  | 0.07 | 0.02 |
| 8/12/2018  | 12Y3 | 12yrs | 104.27 | 0.10 | 0.03 |
| 8/12/2018  | 60Y1 | 60yrs | 62.53  | 0.04 | 0.01 |
| 8/12/2018  | 60Y2 | 60yrs | 73.71  | 0.01 | 0.00 |
| 8/12/2018  | 20Y1 | 20yrs | 112.37 | 0.02 | 0.01 |
| 8/12/2018  | 20Y2 | 20yrs | 79.51  | 0.07 | 0.02 |
| 8/12/2018  | 20Y3 | 20yrs | 63.52  | 0.02 | 0.00 |
| 22/12/2018 | AG1  | Ag    | 27.73  | 0.02 | 0.00 |
| 22/12/2018 | 5Y2  | 5yrs  | 0.81   | 1.35 | 0.00 |
| 22/12/2018 | 5Y3  | 5yrs  | 0.81   | 1.08 | 0.00 |
| 22/12/2018 | 20Y1 | 20yrs | 4.15   | 0.30 | 0.00 |
| 22/12/2018 | 20Y2 | 20yrs | 3.14   | 0.07 | 0.00 |
| 29/12/2018 | AG1  | Ag    | 5.57   | 0.66 | 0.01 |
| 29/12/2018 | AG3  | Ag    | 15.76  | 0.11 | 0.01 |
| 29/12/2018 | AG2  | Ag    | 6.56   | 0.20 | 0.00 |
| 29/12/2018 | 5Y1  | 5yrs  | 7.36   | 0.70 | 0.02 |
| 29/12/2018 | 5Y2  | 5yrs  | 3.22   | 0.91 | 0.01 |
| 29/12/2018 | 12Y3 | 12yrs | 7.69   | 0.68 | 0.02 |
| 29/12/2018 | 12Y3 | 12yrs | 7.69   | 0.35 | 0.01 |
| 29/12/2018 | 60Y1 | 60yrs | 2.05   | 1.24 | 0.01 |
| 29/12/2018 | 60Y2 | 60yrs | 2.62   | 1.72 | 0.01 |
| 29/12/2018 | 60Y3 | 60yrs | 1.99   | 4.73 | 0.03 |
| 5/01/2019  | AG1  | Ag    | 53.48  | 0.06 | 0.01 |
| 5/01/2019  | AG3  | Ag    | 40.46  | 0.03 | 0.00 |
| 5/01/2019  | AG2  | Ag    | 53.62  | 0.05 | 0.01 |
| 5/01/2019  | 5Y1  | 5yrs  | 62.46  | 0.35 | 0.07 |
| 5/01/2019  | 5Y2  | 5yrs  | 17.89  | 0.13 | 0.01 |
| 5/01/2019  | 12Y1 | 12yrs | 28.05  | 0.69 | 0.06 |
| 5/01/2019  | 12Y2 | 12yrs | 54.68  | 0.17 | 0.03 |
| 5/01/2019  | 60Y2 | 60yrs | 64.51  | 0.49 | 0.10 |
| 5/01/2019  | 60Y3 | 60yrs | 62.67  | 0.41 | 0.08 |
| 5/01/2019  | 20Y1 | 20yrs | 69.89  | 0.04 | 0.01 |
| 5/01/2019  | 20Y2 | 20yrs | 52.73  | 0.36 | 0.06 |
| 5/01/2019  | 20Y3 | 20yrs | 18.46  | 0.12 | 0.01 |
| 5/01/2019  | 20Y3 | 20yrs | 18.46  | 0.30 | 0.02 |
| 12/01/2019 | AG1  | Ag    | 5.09   | 0.11 | 0.00 |
| 12/01/2019 | AG3  | Ag    | 5.23   | 0.14 | 0.00 |
| 12/01/2019 | AG2  | Ag    | 13.76  | 0.52 | 0.02 |
| 12/01/2019 | 5Y1  | 5yrs  | 13.79  | 0.51 | 0.02 |
| 12/01/2019 | 5Y2  | 5yrs  | 3.58   | 0.39 | 0.00 |
| 12/01/2019 | 5Y3  | 5yrs  | 25.78  | 0.20 | 0.02 |
| 12/01/2019 | 12Y1 | 12yrs | 23.03  | 0.58 | 0.04 |
| 12/01/2019 | 12Y2 | 12yrs | 24.05  | 0.17 | 0.01 |
| 12/01/2019 | 12Y3 | 12yrs | 46.54  | 0.28 | 0.04 |
| 12/01/2019 | 60Y1 | 60yrs | 1.95   | 1.28 | 0.01 |
| 12/01/2019 | 60Y2 | 60yrs | 5.23   | 0.77 | 0.01 |
| 12/01/2019 | 60Y3 | 60yrs | 3.14   | 2.19 | 0.02 |
| 12/01/2019 | 20Y1 | 20yrs | 10.96  | 0.27 | 0.01 |
| 12/01/2019 | 20Y2 | 20yrs | 2.38   | 1.03 | 0.01 |
| 12/01/2019 | 20Y3 | 20yrs | 0.25   | 1.06 | 0.00 |
| 19/01/2019 | AG1  | Ag    | 21.94  | 0.05 | 0.00 |
| 19/01/2019 | AG3  | Ag    | 26.07  | 0.10 | 0.01 |
| 19/01/2019 | 5Y1  | 5yrs  | 14.64  | 2.16 | 0.10 |
| 19/01/2019 | 5Y2  | 5yrs  | 10.62  | 0.43 | 0.01 |
| 19/01/2019 | 5Y3  | 5yrs  | 18.59  | 0.73 | 0.04 |
| 19/01/2019 | 12Y1 | 12yrs | 18.78  | 1.01 | 0.06 |
| 19/01/2019 | 12Y3 | 12yrs | 10.22  | 0.51 | 0.02 |
| 19/01/2019 | 60Y1 | 60yrs | 11.49  | 0.34 | 0.01 |
| 19/01/2019 | 60Y2 | 60yrs | 13.55  | 0.40 | 0.02 |
| 19/01/2019 | 20Y1 | 20yrs | 3.25   | 1.44 | 0.02 |
| 19/01/2019 | 20Y2 | 20yrs | 12.98  | 0.25 | 0.01 |
| 26/01/2019 | AG3  | Ag    | 4.69   | 0.44 | 0.01 |
| 26/01/2019 | AG2  | Ag    | 5.80   | 1.49 | 0.03 |
| 26/01/2019 | 5Y1  | 5yrs  | 5.01   | 1.45 | 0.02 |
| 26/01/2019 | 5Y2  | 5yrs  | 3.66   | 0.99 | 0.01 |
| 26/01/2019 | 5Y3  | 5yrs  | 5.22   | 1.81 | 0.03 |

|            |      |       |       |      |      |
|------------|------|-------|-------|------|------|
| 26/01/2019 | 12Y1 | 12yrs | 3.75  | 3.66 | 0.04 |
| 26/01/2019 | 12Y2 | 12yrs | 5.22  | 0.55 | 0.01 |
| 26/01/2019 | 60Y1 | 60yrs | 4.86  | 1.32 | 0.02 |
| 26/01/2019 | 60Y2 | 60yrs | 4.31  | 0.75 | 0.01 |
| 26/01/2019 | 60Y3 | 60yrs | 12.31 | 1.66 | 0.07 |
| 26/01/2019 | 20Y2 | 20yrs | 3.49  | 0.55 | 0.01 |
| 26/01/2019 | 20Y3 | 20yrs | 18.75 | 0.73 | 0.04 |
| 2/02/2019  | AG1  | Ag    | 4.16  | 0.74 | 0.01 |
| 2/02/2019  | AG3  | Ag    | 2.87  | 0.36 | 0.00 |
| 2/02/2019  | AG2  | Ag    | 16.84 | 0.27 | 0.01 |
| 2/02/2019  | 5Y1  | 5yrs  | 18.11 | 0.59 | 0.04 |
| 2/02/2019  | 5Y2  | 5yrs  | 11.88 | 0.71 | 0.03 |
| 2/02/2019  | 5Y3  | 5yrs  | 3.51  | 1.80 | 0.02 |
| 2/02/2019  | 12Y2 | 12yrs | 2.86  | 4.06 | 0.04 |
| 2/02/2019  | 12Y3 | 12yrs | 18.04 | 0.39 | 0.02 |
| 2/02/2019  | 60Y1 | 60yrs | 10.60 | 0.55 | 0.02 |
| 2/02/2019  | 60Y3 | 60yrs | 27.13 | 0.99 | 0.09 |
| 2/02/2019  | 20Y1 | 20yrs | 18.75 | 0.17 | 0.01 |
| 2/02/2019  | 20Y1 | 20yrs | 18.75 | 0.17 | 0.01 |
| 2/02/2019  | 20Y2 | 20yrs | 6.30  | 0.87 | 0.02 |
| 9/02/2019  | AG1  | Ag    | 7.31  | 0.46 | 0.01 |
| 9/02/2019  | AG3  | Ag    | 5.01  | 0.50 | 0.01 |
| 9/02/2019  | AG2  | Ag    | 7.22  | 0.33 | 0.01 |
| 9/02/2019  | 5Y1  | 5yrs  | 7.71  | 0.59 | 0.01 |
| 9/02/2019  | 5Y2  | 5yrs  | 3.88  | 0.91 | 0.01 |
| 9/02/2019  | 5Y3  | 5yrs  | 4.45  | 1.18 | 0.02 |
| 9/02/2019  | 12Y1 | 12yrs | 3.42  | 1.59 | 0.02 |
| 9/02/2019  | 12Y1 | 12yrs | 3.42  | 1.63 | 0.02 |
| 9/02/2019  | 12Y2 | 12yrs | 4.77  | 1.18 | 0.02 |
| 9/02/2019  | 12Y3 | 12yrs | 11.53 | 0.55 | 0.02 |
| 9/02/2019  | 60Y1 | 60yrs | 4.48  | 2.56 | 0.04 |
| 9/02/2019  | 60Y2 | 60yrs | 12.38 | 2.37 | 0.10 |
| 9/02/2019  | 20Y1 | 20yrs | 18.75 | 0.30 | 0.02 |
| 9/02/2019  | 20Y3 | 20yrs | 7.25  | 0.61 | 0.01 |
| 2/03/2019  | AG1  | Ag    | 9.05  | 0.27 | 0.01 |
| 2/03/2019  | AG3  | Ag    | 14.50 | 0.13 | 0.01 |
| 2/03/2019  | AG2  | Ag    | 31.19 | 0.19 | 0.02 |
| 2/03/2019  | 5Y2  | 5yrs  | 10.33 | 0.14 | 0.00 |
| 2/03/2019  | 5Y3  | 5yrs  | 10.75 | 0.47 | 0.02 |
| 2/03/2019  | 12Y1 | 12yrs | 6.65  | 1.31 | 0.03 |
| 2/03/2019  | 12Y2 | 12yrs | 9.69  | 0.69 | 0.02 |
| 2/03/2019  | 12Y3 | 12yrs | 10.68 | 0.18 | 0.01 |
| 2/03/2019  | 60Y1 | 60yrs | 8.84  | 1.40 | 0.04 |
| 2/03/2019  | 60Y2 | 60yrs | 10.96 | 2.94 | 0.11 |
| 2/03/2019  | 60Y3 | 60yrs | 9.48  | 3.16 | 0.10 |
| 2/03/2019  | 20Y1 | 20yrs | 27.64 | 0.16 | 0.01 |
| 2/03/2019  | 20Y2 | 20yrs | 8.86  | 0.53 | 0.02 |
| 2/03/2019  | 20Y3 | 20yrs | 5.97  | 0.97 | 0.02 |
| 9/03/2019  | AG3  | Ag    | 53.48 | 0.04 | 0.01 |
| 9/03/2019  | 5Y1  | 5yrs  | 50.22 | 0.14 | 0.02 |
| 9/03/2019  | 5Y3  | 5yrs  | 34.45 | 0.24 | 0.03 |
| 9/03/2019  | 12Y3 | 12yrs | 37.99 | 0.05 | 0.01 |
| 9/03/2019  | 60Y2 | 60yrs | 46.83 | 0.42 | 0.06 |
| 9/03/2019  | 60Y3 | 60yrs | 46.90 | 0.74 | 0.11 |
| 9/03/2019  | 20Y1 | 20yrs | 56.59 | 0.06 | 0.01 |
| 9/03/2019  | 20Y2 | 20yrs | 35.93 | 0.15 | 0.02 |
| 9/03/2019  | 20Y2 | 20yrs | 35.93 | 0.08 | 0.01 |
| 9/03/2019  | 20Y3 | 20yrs | 38.55 | 0.04 | 0.00 |
| 23/03/2019 | AG1  | Ag    | 4.01  | 0.29 | 0.00 |
| 23/03/2019 | AG3  | Ag    | 5.66  | 0.21 | 0.00 |
| 23/03/2019 | AG2  | Ag    | 18.87 | 0.08 | 0.01 |
| 23/03/2019 | 5Y1  | 5yrs  | 23.06 | 0.38 | 0.03 |
| 23/03/2019 | 5Y2  | 5yrs  | 4.87  | 1.18 | 0.02 |
| 23/03/2019 | 5Y3  | 5yrs  | 3.90  | 0.36 | 0.00 |
| 23/03/2019 | 12Y1 | 12yrs | 3.28  | 0.85 | 0.01 |
| 23/03/2019 | 12Y2 | 12yrs | 4.63  | 0.50 | 0.01 |
| 23/03/2019 | 12Y2 | 12yrs | 4.63  | 0.23 | 0.00 |
| 23/03/2019 | 12Y2 | 12yrs | 4.63  | 0.08 | 0.00 |
| 23/03/2019 | 12Y3 | 12yrs | 6.83  | 0.67 | 0.01 |
| 23/03/2019 | 60Y1 | 60yrs | 2.40  | 1.58 | 0.01 |
| 23/03/2019 | 60Y2 | 60yrs | 4.07  | 1.88 | 0.02 |

|            |      |       |        |      |      |
|------------|------|-------|--------|------|------|
| 23/03/2019 | 60Y3 | 60yrs | 3.95   | 5.56 | 0.07 |
| 23/03/2019 | 20Y1 | 20yrs | 8.86   | 0.32 | 0.01 |
| 23/03/2019 | 20Y2 | 20yrs | 3.47   | 1.78 | 0.02 |
| 23/03/2019 | 20Y3 | 20yrs | 3.93   | 0.68 | 0.01 |
| 30/03/2019 | AG1  | Ag    | 88.42  | 0.03 | 0.01 |
| 30/03/2019 | AG3  | Ag    | 104.27 | 0.01 | 0.00 |
| 30/03/2019 | AG2  | Ag    | 102.04 | 0.00 | 0.00 |
| 30/03/2019 | AG2  | Ag    | 102.04 | 0.00 | 0.00 |
| 30/03/2019 | 5Y1  | 5yrs  | 96.13  | 0.13 | 0.04 |
| 30/03/2019 | 5Y2  | 5yrs  | 76.75  | 0.11 | 0.03 |
| 30/03/2019 | 5Y3  | 5yrs  | 86.44  | 0.06 | 0.02 |
| 30/03/2019 | 12Y1 | 12yrs | 90.09  | 0.07 | 0.02 |
| 30/03/2019 | 12Y2 | 12yrs | 101.30 | 0.00 | 0.00 |
| 30/03/2019 | 12Y3 | 12yrs | 78.52  | 0.07 | 0.02 |
| 30/03/2019 | 60Y1 | 60yrs | 71.52  | 0.18 | 0.04 |
| 30/03/2019 | 60Y2 | 60yrs | 80.50  | 0.15 | 0.04 |
| 30/03/2019 | 60Y3 | 60yrs | 75.76  | 0.89 | 0.22 |
| 30/03/2019 | 20Y1 | 20yrs | 86.94  | 0.05 | 0.01 |
| 30/03/2019 | 20Y2 | 20yrs | 72.22  | 0.22 | 0.05 |
| 30/03/2019 | 20Y3 | 20yrs | 138.15 | 0.05 | 0.02 |
| 6/04/2019  | AG1  | Ag    | 40.32  | 0.03 | 0.00 |
| 6/04/2019  | AG3  | Ag    | 50.37  | 0.02 | 0.00 |
| 6/04/2019  | AG2  | Ag    | 34.37  | 0.19 | 0.02 |
| 6/04/2019  | 5Y1  | 5yrs  | 35.47  | 0.15 | 0.02 |
| 6/04/2019  | 5Y2  | 5yrs  | 45.14  | 0.07 | 0.01 |
| 6/04/2019  | 12Y1 | 12yrs | 48.21  | 0.16 | 0.03 |
| 6/04/2019  | 12Y2 | 12yrs | 52.77  | 0.08 | 0.01 |
| 6/04/2019  | 12Y3 | 12yrs | 38.06  | 0.13 | 0.02 |
| 6/04/2019  | 60Y1 | 60yrs | 50.22  | 0.24 | 0.04 |
| 6/04/2019  | 60Y2 | 60yrs | 55.53  | 0.38 | 0.07 |
| 6/04/2019  | 60Y3 | 60yrs | 50.41  | 0.70 | 0.12 |
| 6/04/2019  | 20Y1 | 20yrs | 38.25  | 0.06 | 0.01 |
| 6/04/2019  | 20Y2 | 20yrs | 46.76  | 0.11 | 0.02 |
| 6/04/2019  | 20Y3 | 20yrs | 48.79  | 0.13 | 0.02 |
| 13/04/2019 | AG1  | Ag    | 20.22  | 0.19 | 0.01 |
| 13/04/2019 | AG3  | Ag    | 22.49  | 0.11 | 0.01 |
| 13/04/2019 | AG2  | Ag    | 30.91  | 0.12 | 0.01 |
| 13/04/2019 | 5Y1  | 5yrs  | 32.01  | 1.19 | 0.12 |
| 13/04/2019 | 5Y2  | 5yrs  | 15.49  | 0.29 | 0.01 |
| 13/04/2019 | 5Y3  | 5yrs  | 18.39  | 0.41 | 0.02 |
| 13/04/2019 | 12Y1 | 12yrs | 17.88  | 0.62 | 0.04 |
| 13/04/2019 | 12Y1 | 12yrs | 17.88  | 0.40 | 0.02 |
| 13/04/2019 | 12Y2 | 12yrs | 21.19  | 0.55 | 0.04 |
| 13/04/2019 | 12Y3 | 12yrs | 13.65  | 0.32 | 0.01 |
| 13/04/2019 | 60Y1 | 60yrs | 18.04  | 0.39 | 0.02 |
| 13/04/2019 | 60Y2 | 60yrs | 18.04  | 0.50 | 0.03 |
| 13/04/2019 | 60Y3 | 60yrs | 15.00  | 3.35 | 0.16 |
| 13/04/2019 | 20Y1 | 20yrs | 20.23  | 1.42 | 0.09 |
| 13/04/2019 | 20Y3 | 20yrs | 35.65  | 0.35 | 0.04 |
| 20/04/2019 | AG1  | Ag    | 20.87  | 0.10 | 0.01 |
| 20/04/2019 | AG3  | Ag    | 23.91  | 0.10 | 0.01 |
| 20/04/2019 | AG2  | Ag    | 11.18  | 0.39 | 0.01 |
| 20/04/2019 | 5Y1  | 5yrs  | 9.83   | 0.91 | 0.03 |
| 20/04/2019 | 5Y2  | 5yrs  | 17.00  | 0.26 | 0.01 |
| 20/04/2019 | 5Y2  | 5yrs  | 17.00  | 0.07 | 0.00 |
| 20/04/2019 | 5Y3  | 5yrs  | 17.26  | 0.37 | 0.02 |
| 20/04/2019 | 12Y1 | 12yrs | 13.47  | 0.52 | 0.02 |
| 20/04/2019 | 12Y3 | 12yrs | 10.61  | 0.55 | 0.02 |
| 20/04/2019 | 60Y1 | 60yrs | 20.87  | 0.47 | 0.03 |
| 20/04/2019 | 60Y2 | 60yrs | 18.04  | 0.35 | 0.02 |
| 20/04/2019 | 60Y3 | 60yrs | 22.42  | 0.99 | 0.07 |
| 20/04/2019 | 20Y1 | 20yrs | 9.90   | 0.60 | 0.02 |
| 20/04/2019 | 20Y2 | 20yrs | 13.37  | 0.00 | 0.00 |
| 20/04/2019 | 20Y3 | 20yrs | 10.40  | 0.76 | 0.03 |
| 27/04/2019 | AG1  | Ag    | 55.53  | 0.07 | 0.01 |
| 27/04/2019 | AG3  | Ag    | 32.11  | 0.04 | 0.00 |
| 27/04/2019 | AG2  | Ag    | 61.68  | 0.03 | 0.01 |
| 27/04/2019 | 5Y1  | 5yrs  | 55.46  | 0.26 | 0.05 |
| 27/04/2019 | 5Y2  | 5yrs  | 25.25  | 0.12 | 0.01 |
| 27/04/2019 | 5Y3  | 5yrs  | 25.04  | 0.32 | 0.03 |
| 27/04/2019 | 12Y1 | 12yrs | 21.05  | 0.33 | 0.02 |

|            |      |       |        |      |      |
|------------|------|-------|--------|------|------|
| 27/04/2019 | 12Y2 | 12yrs | 20.94  | 0.06 | 0.00 |
| 27/04/2019 | 60Y1 | 60yrs | 30.77  | 0.51 | 0.05 |
| 27/04/2019 | 60Y2 | 60yrs | 27.09  | 0.69 | 0.06 |
| 27/04/2019 | 60Y3 | 60yrs | 34.24  | 0.81 | 0.09 |
| 27/04/2019 | 20Y1 | 20yrs | 45.84  | 0.10 | 0.01 |
| 27/04/2019 | 20Y2 | 20yrs | 22.99  | 0.22 | 0.02 |
| 27/04/2019 | 20Y3 | 20yrs | 32.96  | 0.43 | 0.05 |
| 4/05/2019  | AG1  | Ag    | 24.19  | 0.04 | 0.00 |
| 4/05/2019  | AG3  | Ag    | 18.38  | 0.12 | 0.01 |
| 4/05/2019  | AG2  | Ag    | 14.15  | 0.18 | 0.01 |
| 4/05/2019  | 5Y1  | 5yrs  | 13.94  | 0.65 | 0.03 |
| 4/05/2019  | 5Y3  | 5yrs  | 14.64  | 0.32 | 0.02 |
| 4/05/2019  | 12Y1 | 12yrs | 13.92  | 0.70 | 0.03 |
| 4/05/2019  | 60Y1 | 60yrs | 18.39  | 1.18 | 0.07 |
| 4/05/2019  | 60Y1 | 60yrs | 18.39  | 0.03 | 0.00 |
| 4/05/2019  | 60Y2 | 60yrs | 30.56  | 0.67 | 0.07 |
| 4/05/2019  | 60Y3 | 60yrs | 15.14  | 2.12 | 0.10 |
| 4/05/2019  | 20Y1 | 20yrs | 20.23  | 0.56 | 0.04 |
| 4/05/2019  | 20Y3 | 20yrs | 16.98  | 0.73 | 0.04 |
| 11/05/2019 | AG1  | Ag    | 166.94 | 0.00 | 0.00 |
| 11/05/2019 | AG3  | Ag    | 146.00 | 0.00 | 0.00 |
| 11/05/2019 | AG3  | Ag    | 146.00 | 0.00 | 0.00 |
| 11/05/2019 | AG2  | Ag    | 96.49  | 0.00 | 0.00 |
| 11/05/2019 | 5Y1  | 5yrs  | 103.77 | 0.12 | 0.04 |
| 11/05/2019 | 5Y2  | 5yrs  | 121.67 | 0.05 | 0.02 |
| 11/05/2019 | 12Y1 | 12yrs | 141.48 | 0.09 | 0.04 |
| 11/05/2019 | 12Y2 | 12yrs | 184.48 | 0.08 | 0.05 |
| 11/05/2019 | 60Y1 | 60yrs | 137.94 | 0.19 | 0.09 |
| 11/05/2019 | 60Y2 | 60yrs | 152.79 | 0.28 | 0.14 |
| 11/05/2019 | 60Y3 | 60yrs | 165.80 | 0.38 | 0.20 |
| 11/05/2019 | 20Y2 | 20yrs | 135.11 | 0.04 | 0.02 |
| 11/05/2019 | 20Y3 | 20yrs | 231.31 | 0.09 | 0.07 |
| 18/05/2019 | AG1  | Ag    | 132.92 | 0.01 | 0.01 |
| 18/05/2019 | AG3  | Ag    | 59.14  | 0.01 | 0.00 |
| 18/05/2019 | AG2  | Ag    | 70.74  | 0.01 | 0.00 |
| 18/05/2019 | 5Y1  | 5yrs  | 50.93  | 0.23 | 0.04 |
| 18/05/2019 | 5Y2  | 5yrs  | 39.54  | 0.14 | 0.02 |
| 18/05/2019 | 5Y3  | 5yrs  | 52.91  | 0.17 | 0.03 |
| 18/05/2019 | 5Y3  | 5yrs  | 52.91  | 0.20 | 0.04 |
| 18/05/2019 | 12Y1 | 12yrs | 28.07  | 0.39 | 0.04 |
| 18/05/2019 | 12Y2 | 12yrs | 55.46  | 0.14 | 0.03 |
| 18/05/2019 | 12Y3 | 12yrs | 96.20  | 0.41 | 0.13 |
| 18/05/2019 | 60Y1 | 60yrs | 44.85  | 1.29 | 0.19 |
| 18/05/2019 | 60Y2 | 60yrs | 48.60  | 0.65 | 0.10 |
| 18/05/2019 | 60Y3 | 60yrs | 45.56  | 1.49 | 0.22 |
| 18/05/2019 | 20Y1 | 20yrs | 62.82  | 0.10 | 0.02 |
| 18/05/2019 | 20Y2 | 20yrs | 37.92  | 0.36 | 0.04 |
| 25/05/2019 | AG1  | Ag    | 13.16  | 0.03 | 0.00 |
| 25/05/2019 | AG3  | Ag    | 50.93  | 0.05 | 0.01 |
| 25/05/2019 | AG2  | Ag    | 51.78  | 0.06 | 0.01 |
| 25/05/2019 | 5Y1  | 5yrs  | 54.04  | 0.22 | 0.04 |
| 25/05/2019 | 5Y3  | 5yrs  | 56.24  | 0.13 | 0.02 |
| 25/05/2019 | 12Y1 | 12yrs | 50.37  | 0.38 | 0.06 |
| 25/05/2019 | 60Y1 | 60yrs | 10.68  | 1.87 | 0.07 |
| 25/05/2019 | 60Y2 | 60yrs | 11.74  | 1.78 | 0.07 |
| 25/05/2019 | 20Y1 | 20yrs | 32.68  | 0.33 | 0.03 |
| 25/05/2019 | 20Y2 | 20yrs | 10.75  | 0.51 | 0.02 |
| 25/05/2019 | 20Y3 | 20yrs | 72.72  | 0.12 | 0.03 |
| 1/06/2019  | AG1  | Ag    | 38.69  | 0.05 | 0.01 |
| 1/06/2019  | AG3  | Ag    | 14.22  | 0.18 | 0.01 |
| 1/06/2019  | AG2  | Ag    | 15.14  | 0.09 | 0.00 |
| 1/06/2019  | 5Y1  | 5yrs  | 14.15  | 0.25 | 0.01 |
| 1/06/2019  | 5Y3  | 5yrs  | 15.85  | 0.29 | 0.02 |
| 1/06/2019  | 12Y1 | 12yrs | 11.09  | 0.63 | 0.02 |
| 1/06/2019  | 12Y2 | 12yrs | 18.11  | 0.45 | 0.03 |
| 1/06/2019  | 12Y3 | 12yrs | 65.43  | 0.53 | 0.11 |
| 1/06/2019  | 60Y1 | 60yrs | 29.00  | 1.49 | 0.14 |
| 1/06/2019  | 60Y2 | 60yrs | 35.79  | 0.44 | 0.05 |
| 1/06/2019  | 60Y3 | 60yrs | 55.18  | 0.74 | 0.13 |
| 1/06/2019  | 20Y1 | 20yrs | 12.31  | 0.11 | 0.00 |
| 1/06/2019  | 20Y2 | 20yrs | 24.97  | 0.30 | 0.02 |

|            |      |       |       |      |      |
|------------|------|-------|-------|------|------|
| 1/06/2019  | 20Y2 | 20yrs | 24.97 | 0.25 | 0.02 |
| 1/06/2019  | 20Y3 | 20yrs | 26.74 | 0.13 | 0.01 |
| 8/06/2019  | AG1  | Ag    | 44.49 | 0.06 | 0.01 |
| 8/06/2019  | AG3  | Ag    | 23.98 | 0.08 | 0.01 |
| 8/06/2019  | AG2  | Ag    | 23.41 | 0.10 | 0.01 |
| 8/06/2019  | 5Y1  | 5yrs  | 22.84 | 0.25 | 0.02 |
| 8/06/2019  | 5Y2  | 5yrs  | 22.00 | 0.44 | 0.03 |
| 8/06/2019  | 5Y3  | 5yrs  | 29.99 | 0.21 | 0.02 |
| 8/06/2019  | 12Y1 | 12yrs | 23.20 | 0.53 | 0.04 |
| 8/06/2019  | 12Y2 | 12yrs | 34.80 | 0.15 | 0.02 |
| 8/06/2019  | 60Y1 | 60yrs | 42.23 | 0.61 | 0.08 |
| 8/06/2019  | 60Y2 | 60yrs | 48.74 | 0.44 | 0.07 |
| 8/06/2019  | 60Y3 | 60yrs | 25.75 | 0.59 | 0.05 |
| 8/06/2019  | 20Y1 | 20yrs | 38.54 | 0.09 | 0.01 |
| 8/06/2019  | 20Y2 | 20yrs | 41.24 | 0.15 | 0.02 |
| 8/06/2019  | 20Y3 | 20yrs | 12.18 | 0.63 | 0.02 |
| 15/06/2019 | AG1  | Ag    | 4.46  | 0.20 | 0.00 |
| 15/06/2019 | AG2  | Ag    | 7.78  | 0.59 | 0.01 |
| 15/06/2019 | 5Y1  | 5yrs  | 6.58  | 0.64 | 0.01 |
| 15/06/2019 | 12Y1 | 12yrs | 4.87  | 2.64 | 0.04 |
| 15/06/2019 | 12Y3 | 12yrs | 1.92  | 1.08 | 0.01 |
| 15/06/2019 | 60Y1 | 60yrs | 4.67  | 0.85 | 0.01 |
| 15/06/2019 | 20Y1 | 20yrs | 3.40  | 0.35 | 0.00 |
| 15/06/2019 | 20Y2 | 20yrs | 3.47  | 0.73 | 0.01 |
| 15/06/2019 | 20Y3 | 20yrs | 63.34 | 0.07 | 0.01 |
| 22/06/2019 | AG1  | Ag    | 72.01 | 0.04 | 0.01 |
| 22/06/2019 | AG3  | Ag    | 6.56  | 0.19 | 0.00 |
| 22/06/2019 | AG2  | Ag    | 52.19 | 0.08 | 0.01 |
| 22/06/2019 | 5Y1  | 5yrs  | 49.52 | 0.42 | 0.07 |
| 22/06/2019 | 5Y2  | 5yrs  | 35.16 | 0.20 | 0.02 |
| 22/06/2019 | 5Y3  | 5yrs  | 33.95 | 0.21 | 0.02 |
| 22/06/2019 | 12Y1 | 12yrs | 32.26 | 0.34 | 0.04 |
| 22/06/2019 | 12Y2 | 12yrs | 44.92 | 0.29 | 0.04 |
| 22/06/2019 | 12Y3 | 12yrs | 43.50 | 0.26 | 0.04 |
| 22/06/2019 | 60Y1 | 60yrs | 47.09 | 0.28 | 0.04 |
| 22/06/2019 | 60Y2 | 60yrs | 56.09 | 0.62 | 0.11 |
| 22/06/2019 | 60Y2 | 60yrs | 56.09 | 0.00 | 0.00 |
| 22/06/2019 | 60Y3 | 60yrs | 6.15  | 1.32 | 0.03 |
| 22/06/2019 | 20Y1 | 20yrs | 36.78 | 0.17 | 0.02 |
| 22/06/2019 | 20Y2 | 20yrs | 46.76 | 0.17 | 0.03 |
| 22/06/2019 | 20Y3 | 20yrs | 7.07  | 0.02 | 0.00 |
| 29/06/2019 | AG3  | Ag    | 40.32 | 0.03 | 0.00 |
| 29/06/2019 | AG3  | Ag    | 40.32 | 0.03 | 0.00 |
| 29/06/2019 | AG2  | Ag    | 31.62 | 0.04 | 0.00 |
| 29/06/2019 | 5Y1  | 5yrs  | 31.48 | 0.30 | 0.03 |
| 29/06/2019 | 5Y2  | 5yrs  | 33.25 | 0.22 | 0.02 |
| 29/06/2019 | 5Y3  | 5yrs  | 37.13 | 0.35 | 0.04 |
| 29/06/2019 | 12Y1 | 12yrs | 49.46 | 0.15 | 0.02 |
| 29/06/2019 | 12Y2 | 12yrs | 41.31 | 0.52 | 0.07 |
| 29/06/2019 | 60Y1 | 60yrs | 18.67 | 0.91 | 0.06 |
| 29/06/2019 | 60Y2 | 60yrs | 28.01 | 0.51 | 0.05 |
| 29/06/2019 | 60Y3 | 60yrs | 24.40 | 0.65 | 0.05 |
| 29/06/2019 | 20Y1 | 20yrs | 22.78 | 0.14 | 0.01 |
| 29/06/2019 | 20Y2 | 20yrs | 25.82 | 0.36 | 0.03 |
| 29/06/2019 | 20Y3 | 20yrs | 71.09 | 0.20 | 0.05 |
| 6/07/2019  | AG1  | Ag    | 12.45 | 0.29 | 0.01 |
| 6/07/2019  | AG3  | Ag    | 14.22 | 0.11 | 0.00 |
| 6/07/2019  | AG2  | Ag    | 16.71 | 0.10 | 0.01 |
| 6/07/2019  | 5Y1  | 5yrs  | 15.43 | 0.63 | 0.03 |
| 6/07/2019  | 5Y2  | 5yrs  | 12.31 | 0.31 | 0.01 |
| 6/07/2019  | 5Y3  | 5yrs  | 16.62 | 0.39 | 0.02 |
| 6/07/2019  | 5Y3  | 5yrs  | 16.62 | 0.34 | 0.02 |
| 6/07/2019  | 12Y1 | 12yrs | 9.85  | 0.00 | 0.00 |
| 6/07/2019  | 12Y2 | 12yrs | 13.65 | 0.71 | 0.03 |
| 6/07/2019  | 12Y3 | 12yrs | 12.03 | 0.36 | 0.01 |
| 6/07/2019  | 60Y1 | 60yrs | 11.67 | 0.01 | 0.00 |
| 6/07/2019  | 60Y1 | 60yrs | 11.67 | 0.86 | 0.03 |
| 6/07/2019  | 60Y2 | 60yrs | 11.67 | 1.03 | 0.04 |
| 6/07/2019  | 60Y3 | 60yrs | 11.46 | 1.72 | 0.06 |
| 6/07/2019  | 20Y1 | 20yrs | 25.61 | 0.36 | 0.03 |
| 6/07/2019  | 20Y2 | 20yrs | 13.02 | 0.68 | 0.03 |

|            |      |       |       |      |      |
|------------|------|-------|-------|------|------|
| 6/07/2019  | 20Y3 | 20yrs | 85.73 | 0.24 | 0.07 |
| 13/07/2019 | AG1  | Ag    | 76.75 | 0.06 | 0.02 |
| 13/07/2019 | AG3  | Ag    | 74.98 | 0.03 | 0.01 |
| 13/07/2019 | AG2  | Ag    | 91.39 | 0.02 | 0.01 |
| 13/07/2019 | 5Y3  | 5yrs  | 72.93 | 0.26 | 0.06 |
| 13/07/2019 | 12Y1 | 12yrs | 49.23 | 0.57 | 0.09 |
| 13/07/2019 | 12Y2 | 12yrs | 65.50 | 0.32 | 0.07 |
| 13/07/2019 | 12Y3 | 12yrs | 43.36 | 0.31 | 0.04 |
| 13/07/2019 | 60Y1 | 60yrs | 61.54 | 0.64 | 0.13 |
| 13/07/2019 | 60Y2 | 60yrs | 66.42 | 0.43 | 0.09 |
| 13/07/2019 | 60Y3 | 60yrs | 68.90 | 0.56 | 0.13 |
| 13/07/2019 | 20Y1 | 20yrs | 73.43 | 0.13 | 0.03 |
| 13/07/2019 | 20Y2 | 20yrs | 69.32 | 0.16 | 0.04 |
| 13/07/2019 | 20Y3 | 20yrs | 23.91 | 0.45 | 0.03 |
| 20/07/2019 | AG1  | Ag    | 2.47  | 0.65 | 0.01 |
| 20/07/2019 | AG3  | Ag    | 2.69  | 1.18 | 0.01 |
| 20/07/2019 | AG2  | Ag    | 2.26  | 0.43 | 0.00 |
| 20/07/2019 | 5Y1  | 5yrs  | 1.84  | 0.99 | 0.01 |
| 20/07/2019 | 5Y2  | 5yrs  | 1.67  | 0.89 | 0.00 |
| 20/07/2019 | 5Y3  | 5yrs  | 2.19  | 1.41 | 0.01 |
| 20/07/2019 | 12Y1 | 12yrs | 0.74  | 3.37 | 0.01 |
| 20/07/2019 | 12Y2 | 12yrs | 1.59  | 0.05 | 0.00 |
| 20/07/2019 | 12Y3 | 12yrs | 1.70  | 3.85 | 0.02 |
| 20/07/2019 | 60Y1 | 60yrs | 1.74  | 2.43 | 0.01 |
| 20/07/2019 | 60Y2 | 60yrs | 1.72  | 2.18 | 0.01 |
| 20/07/2019 | 60Y3 | 60yrs | 1.93  | 3.75 | 0.02 |
| 20/07/2019 | 20Y1 | 20yrs | 2.19  | 1.10 | 0.01 |
| 20/07/2019 | 20Y2 | 20yrs | 3.20  | 0.81 | 0.01 |
| 20/07/2019 | 20Y3 | 20yrs | 2.05  | 1.16 | 0.01 |
| 27/07/2019 | 5Y1  | 5yrs  | 71.73 | 0.15 | 0.04 |
| 27/07/2019 | 5Y2  | 5yrs  | 61.82 | 0.24 | 0.05 |
| 22/09/2018 | AG1  | Ag    | 60.02 | 0.01 | 0.00 |
| 22/09/2018 | AG3  | Ag    | 57.16 | 0.02 | 0.00 |
| 22/09/2018 | AG2  | Ag    | 32.47 | 0.04 | 0.00 |
| 22/09/2018 | 5Y1  | 5yrs  | 33.32 | 0.29 | 0.03 |
| 22/09/2018 | 5Y3  | 5yrs  | 47.18 | 0.09 | 0.01 |
| 22/09/2018 | 12Y1 | 12yrs | 45.05 | 0.09 | 0.01 |
| 22/09/2018 | 12Y2 | 12yrs | 53.69 | 0.04 | 0.01 |
| 22/09/2018 | 60Y1 | 60yrs | 50.22 | 0.01 | 0.00 |
| 22/09/2018 | 60Y2 | 60yrs | 50.29 | 0.05 | 0.01 |
| 22/09/2018 | 60Y3 | 60yrs | 19.28 | 0.80 | 0.05 |
| 22/09/2018 | 20Y2 | 20yrs | 43.50 | 0.05 | 0.01 |
| 22/09/2018 | 20Y3 | 20yrs | 31.05 | 0.08 | 0.01 |
| 13/10/2018 | AG1  | Ag    | 7.07  | 0.05 | 0.00 |
| 13/10/2018 | AG2  | Ag    | 10.72 | 0.15 | 0.01 |
| 13/10/2018 | 5Y3  | 5yrs  | 7.46  | 0.45 | 0.01 |
| 13/10/2018 | 12Y1 | 12yrs | 4.21  | 0.08 | 0.00 |
| 13/10/2018 | 12Y2 | 12yrs | 7.60  | 0.17 | 0.00 |
| 13/10/2018 | 60Y1 | 60yrs | 2.97  | 0.96 | 0.01 |
| 13/10/2018 | 60Y2 | 60yrs | 4.88  | 1.22 | 0.02 |
| 13/10/2018 | 20Y1 | 20yrs | 9.39  | 0.00 | 0.00 |
| 13/10/2018 | 20Y2 | 20yrs | 3.61  | 0.42 | 0.00 |



**Table S4.** Underlying equations and R<sup>2</sup> values for the relationships shown in Figure 3.

|        | P dep                                        | R <sup>2</sup> |
|--------|----------------------------------------------|----------------|
| Ag1    | $P \text{ dep}=0.0007*\text{Volume}^{0.93}$  | 0.13           |
| Ag2    | $P \text{ dep}=0.4528*\text{Volume}^{-0.95}$ | 0.18           |
| Ag3    | $P \text{ dep}=0.1727*\text{Volume}^{-0.83}$ | 0.16           |
| 5yrs1  | $P \text{ dep}=0.0152*\text{Volume}^{0.59}$  | 0.38           |
| 5yrs2  | $P \text{ dep}=0.007*\text{Volume}^{0.63}$   | 0.36           |
| 5yrs3  | $P \text{ dep}=0.0109*\text{Volume}^{0.57}$  | 0.10           |
| 12yrs1 | $P \text{ dep}=0.0078*\text{Volume}^{0.74}$  | 0.09           |
| 12yrs2 | $P \text{ dep}=0.0024*\text{Volume}^{0.9}$   | 0.20           |
| 12yrs3 | $P \text{ dep}=0.0077*\text{Volume}^{0.68}$  | 0.34           |
| 20yrs1 | $P \text{ dep}=0.0042*\text{Volume}^{0.69}$  | 0.04           |
| 20yrs2 | $P \text{ dep}=0.0074*\text{Volume}^{0.6}$   | 0.03           |
| 20yrs3 | $P \text{ dep}=0.0042*\text{Volume}^{0.78}$  | 0.36           |
| 60yrs1 | $P \text{ dep}=0.0068*\text{Volume}^{0.84}$  | 0.07           |
| 60yrs2 | $P \text{ dep}=0.0086*\text{Volume}^{0.78}$  | 0.00           |
| 60yrs3 | $P \text{ dep}=0.041*\text{Volume}^{0.56}$   | 0.70           |
